# Supplementary material
Source: Springer Nature journal article supplement (https://www.springermedizin.de/resource/supplementary/12974_2011_395_MOESM1_ESM.pdf/9601572)
Supplement: MOESM1 [file 9601572]

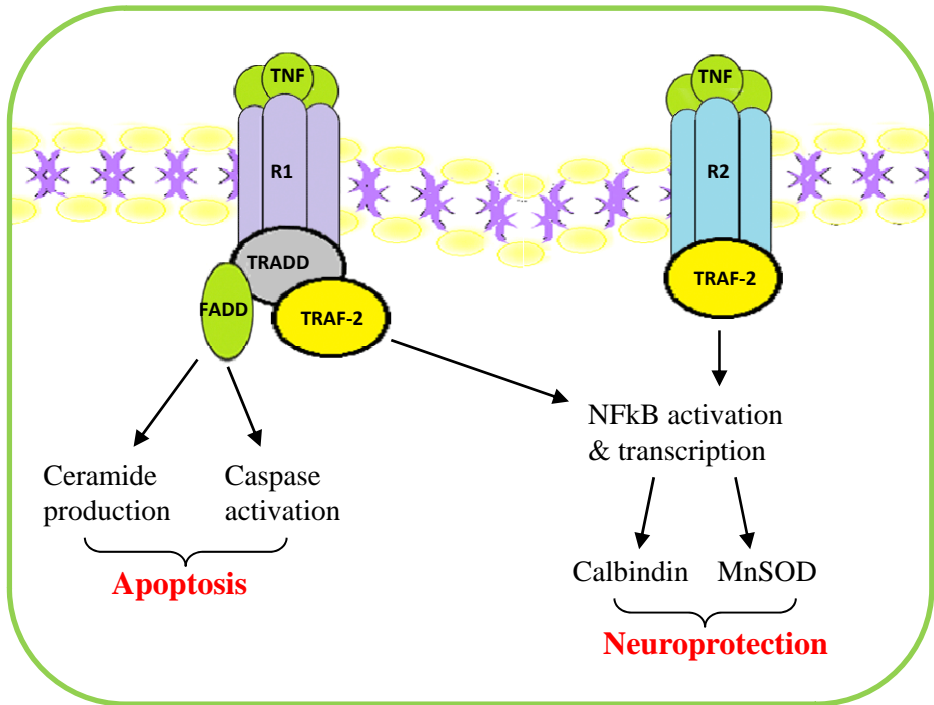

Ceramide  
production      Caspase  
activation

**Apoptosis**

NFκB activation  
& transcription

Calbindin      MnSOD

**Neuroprotection**
